# Supplementary material for: Kinetics of miR-122 Expression in the Liver during Acute HCV Infection
Source: PLoS One. 2013 Oct 4;8(10):e76501. doi: 10.1371/journal.pone.0076501 (PMC3790687; doi:10.1371/journal.pone.0076501)
Supplement: Table S1 — (XLSX) [file pone.0076501.s001.xlsx]

## Sheet: Sheet1
Supplemental table S1. Cycle threshold values for 12 candidate normlaizers from CH256, CH6413, and CH1541. The dataset consiste of 6 preinoculated liver samples in CH256 and 5 in CH6413 and CH1541. HCV-infected liver samples, n=13 for CH256, n=14 for CH6413, and n=12 for CH1541.
CH256	Days after inoculation
candidate normalizer	-56	-37	-44	-31	-24	0	4	12	32	40	53	75	82	95	103	124	145	152	180
miR-39	13.6857	14.5456	13.6921	14.7777	14.0682	13.4468	13.788	13.7907	13.9869	13.9946	13.7648	13.905	14.1318	13.478	13.6011	13.7078	13.6171	13.9174	13.9751
RNU6	30.7248	23.4482	30.1763	23.499	23.7268	30.0002	22.6996	22.8718	22.9302	29.3376	25.3009	28.6843	23.3234	28.6274	23.1016	23.5453	28.2865	23.5682	23.2261
SNORD61	29.74	24.6805	28.6275	24.8796	24.7638	26.6593	22.8289	23.9884	23.6629	25.9553	24.0923	25.6923	23.8266	25.4314	23.9375	24.1973	26.0373	24.2337	24.0818
SNORD72	35.7415	30.7739	34.5168	30.4642	30.6234	34.8339	27.8012	27.5269	27.4057	33.922	31.6317	33.4028	28.0692	34.2319	27.5908	27.8806	32.4378	28.3828	28.0592
SNORD95	25.9154	22.9428	25.9841	22.9839	23.1603	25.5011	23.0329	23.1327	22.7305	24.8495	24.0862	24.4247	22.5349	24.1889	22.8857	23.046	24.4137	23.4051	23.1015
SNORD68	27.9883	26.1967	24.289	26.8397	27.2967	23.4429	22.7778	22.9238	22.5635	23.0223	22.8312	22.9968	22.269	22.8801	22.6464	23.0254	23.0964	23.3618	23.0382
SNORD96	31.3322	25.7045	28.2754	25.9371	26.2024	26.2658	22.6237	22.826	22.3611	25.186	24.9681	24.8966	22.2379	24.5278	22.4877	22.7605	25.1475	23.2359	22.9516
let-7b	28.9852	26.1728	30.9569	26.5927	26.363	31.9024	25.062	25.1498	24.5154	29.8278	27.3347	30.2613	24.2979	31.0628	24.959	24.5206	29.103	25.0297	24.5593
miR-103	28.5346	27.9629	33.5566	28.5462	28.3714	31.2515	29.8246	30.082	28.6397	33.9511	32.2331	33.4431	29.4112	33.2479	29.0019	29.1201	33.7676	29.554	29.1788
miR-15a	31.2922	31.9954	34.5425	32.1172	31.286	34.6662	33.0383	32.911	32.5591	33.9711	34.1338	34.3481	33.041	33.9386	32.842	32.5707	33.4633	32.8809	32.79
miR-17	33.0432	32.8952	34.7914	33.2884	32.843	34.8511	31.5107	31.4896	31.3129	34.291	33.5609	34.4483	31.5279	34.9476	31.4985	31.3541	34.4342	32.0288	31.6992
miR-191	32.3828	30.0325	28.0694	30.1975	30.2559	26.7212	22.4599	23.5811	23.3508	28.3455	25.9724	29.0607	23.3698	28.5795	23.5729	23.5444	28.2463	23.6921	23.4285
miR-122	28.81	24.31	27.4	24.45	24.68	28.4	21.4	21.59	21.95	27.51	25.46	28.87	21.63	29.01	21.66	20.79	26.51	20.98	20.68
Group ID	1	1	1	1	1	1	2	2	2	2	2	2	2	2	2	2	2	2	2
CH6413	Days after inoculation
candidate normalizer	-44	-37	-31	-16	0	4	12	19	32	40	47	53	61	68	82	88	103	152	180
miR-39	10.9483	14.9973	14.9492	11.3892	12.3204	11.3913	11.3399	11.7227	11.2862	11.384	11.8018	11.2657	11.2744	10.7712	10.515	10.8749	10.8408	11.3793	11.087
RNU6	25.8498	22.788	22.6956	27.753	26.4153	21.798	22.8788	23.3288	25.2418	24.5771	25.1374	26.9648	26.0923	26.4405	26.0689	23.959	23.4892	22.9453	25.2776
SNORD68	24.3979	18.25	18.0848	25.2646	19.0602	23.2617	23.7522	23.5681	23.3976	23.5012	23.0733	23.3692	24.0689	24.5638	24.4242	23.2908	23.8249	23.4162	24.2774
SNORD61	25.1239	24.8298	25.173	26.5088	26.945	22.5299	23.3155	23.4485	24.3197	24.0391	24.1054	25.167	25.0806	25.5021	25.2465	23.6249	23.6571	23.1807	24.7775
SNORD96A	26.0129	24.9585	25.1673	29.0066	26.7024	24.3703	25.699	26.479	25.0721	24.8131	25.0777	26.4079	26.359	26.6797	28.4882	24.6302	26.0605	25.8146	27.9224
SNORD95	25.5684	23.4729	23.7553	27.7577	24.8758	23.4501	24.5073	24.9637	24.6959	24.4261	24.5915	25.7874	25.7198	26.0909	26.8674	24.1276	24.8588	24.4977	26.3499
SNORD72	32.4592	30.7816	30.9074	33.7805	32.9981	30.5116	29.4921	30.2168	31.6071	29.9301	31.6726	28.0324	29.5624	31.3979	32.8523	31.251	30.7798	31.7461	29.3797
let-7b	27.8098	26.9556	27.7677	28.1196	28.3273	24.5497	24.6317	24.9266	27.6828	25.9973	27.3607	28.275	27.3803	26.5288	27.1287	27.2185	26.615	25.7162	26.1524
miR-103	44.3164	32.622	32.2478	44.8847	33.2449	40.6216	41.8426	41.8983	44.2069	42.9334	42.6024	44.6247	43.7792	43.9279	41.5961	43.9241	42.3593	42.7023	42.772
miR-15a	33.8792	31.6021	31.5677	34.2211	29.8668	33.6647	32.8783	33.6958	32.791	33.9887	33.3204	33.7909	33.7337	33.9447	33.7678	33.409	33.1931	33.5157	33.4623
miR-191	34.5899	30.8662	31.3391	33.4993	31.8294	30.1693	30.7577	31.0615	34.9255	33.9964	34.7244	34.5465	35.2871	34.5569	33.3098	33.3821	32.5724	32.1382	33.357
miR-122	27.08	24.56	24.7	27.11	25.43	23.74	24.57	25.09	28.54	25.79	27.54	29.03	26.93	26.76	27.04	28.18	25.72	24.94	25.52
Group ID	1	1	1	1	1	2	2	2	2	2	2	2	2	2	2	2	2	2	2
CH1541	Days after inoculation
candidate normalizer	-24	-53	-16	-7	0	4	12	32	40	47	53	75	82	103	110	152	173
miR-39	10.9176	10.8965	13.9868	14.5758	11.2964	11.8364	11.4875	11.9262	12.2711	11.5517	11.384	10.9099	11.2588	11.9999	11.3107	11.41	11.9458
RNU6	28.1121	28.1307	23.5605	23.5888	27.3132	26.4619	26.7584	26.5275	25.5376	26.0568	26.1014	27.1177	26.868	20.7948	22.2448	23.2082	22.2782
SNORD68	26.1394	27.8773	25.242	25.4283	24.3982	24.5106	23.6748	23.3664	24.5638	23.4028	23.5795	27.132	25.4779	22.1315	24.2213	23.0672	23.0493
SNORD61	31.2308	32.0264	24.951	24.9386	28.2335	28.2685	27.1252	26.8458	27.3464	26.782	26.8452	30.495	29.1721	24.1045	26.4281	25.5901	25.4502
SNORD96A	30.5836	31.0709	25.1435	25.786	27.2809	28.1881	26.7086	26.5624	26.7401	25.9585	26.0535	29.2647	28.657	23.9328	26.8614	26.8683	26.2379
SNORD95	27.1136	28.2073	23.1972	23.2031	25.0769	25.7801	24.6463	24.3002	24.7223	24.1327	24.1954	27.5113	26.5447	22.1352	24.6775	24.1961	23.7718
SNORD72	34.7984	35.3173	30.7677	30.9364	34.3898	32.4486	33.3923	32.8154	30.8425	32.6637	32.2652	32.6942	32.5228	27.5873	29.1461	30.6412	29.2222
let-7b	30.9932	31.2884	26.9133	26.2536	30.5414	28.7214	30.1677	29.783	28.8752	29.336	29.4248	30.2852	29.9448	26.0831	26.1653	27.2719	26.3496
miR-103	31.5529	32.4782	27.6134	29.0918	31.3858	30.852	30.5561	30.3825	32.4392	30.4925	30.6392	29.0477	31.2927	27.621	27.8745	29.2302	28.1662
miR-15a	34.2122	30.0399	32.1951	32.2271	33.9078	34.5928	34.8416	32.7762	34.1792	32.8391	33.4831	34.7841	35.415	33.2639	32.3182	33.1796	33.0446
miR-191	32.7917	33.0194	30.313	30.9489	32.249	32.9961	32.0963	32.8595	33.8325	32.8604	32.9461	33.7812	32.5858	30.2409	30.5364	30.2279	29.8856
miR-17	31.8182	32.7419	34.0339	32.9843	32.2057	32.6288	31.8401	31.3824	33.0368	32.0226	33.0114	33.4002	32.7649	31.4473	30.3364	31.1088	31.549
miR-122	27.66	24.46	25.08	24.75	27.66	25.79	27.54	27.77	27.78	27.77	27.65	27.3	26.42	23.44	22.79	24.1	23.26
Group ID	1	1	1	1	1	2	2	2	2	2	2	2	2	2	2	2	2
